# Supplementary material for: Layered photochromic films stacked from spiropyran-modified montmorillonite nanosheets
Source: Royal Society of Chemistry journal article supplement (doi:10.1039/c9ra01480b), 2019-01-01
Supplement: c9ra01480b1.pdf [file c9ra01480b1.pdf]

## Electronic Supplementary Information

### Layered Photochromic Films Stacked from Spiropyran-modified Montmorillonite Nanosheets

*Mengke Gan,<sup>a†</sup> Tianliang Xiao,<sup>a†</sup> Zhaoyue Liu<sup>\*a</sup> and Yao Wang<sup>\*b</sup>*

<sup>a</sup> Key Laboratory of Bio-Inspired Smart Interfacial Science and Technology of Ministry of Education, School of Chemistry, Beihang University, Beijing 100191, P. R. China. E-mail: [liuzy@buaa.edu.cn](mailto:liuzy@buaa.edu.cn).

<sup>b</sup> Guangdong Provincial Key Laboratory of Optical Information Materials and Technology, Institute of Electronic Paper Displays, South China Academy of Advanced Optoelectronics, South China Normal University, Guangzhou 510006, P. R. China. E-mail: [wangyao@m.scnu.edu.cn](mailto:wangyao@m.scnu.edu.cn).

† Mengke Gan and Tianliang Xiao contributed equally to this work.

#### Contents:

1. Photochromism of the decolored SP-6 aqueous solution (in SP form) under UV irradiation for different time (Figure S1).
2. Characterization of a film prepared by montmorillonite nanosheets exfoliated by only DODAB (without SP-6) (Figure S2).
3. <sup>1</sup>HNMR spectrum of SP-6 (Figure S3).
4. Mass spectrum of SP-6 (Figure S4).

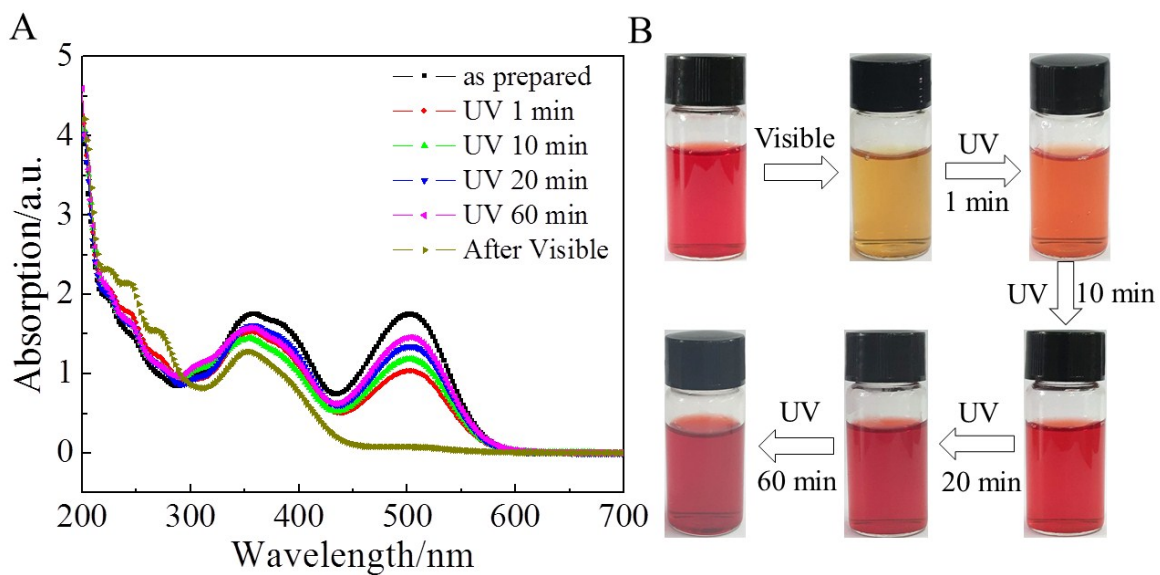

**Figure S1.** (A) The UV-visible absorption spectra for the as-prepared SP-6 solution, the SP-6 solution after visible illumination and the followed UV illumination for different time. (B) The corresponding visual color change of the solution.

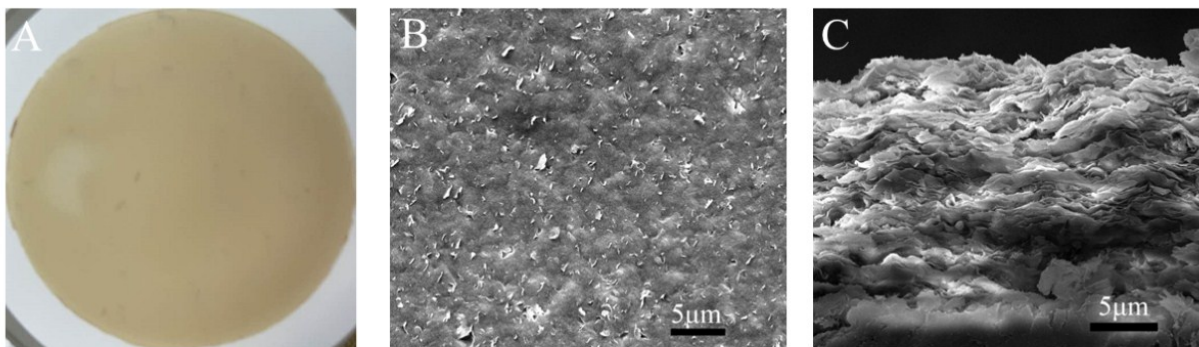

**Figure S2.** (A) A photograph of a film on nylon filter prepared by vacuum filtration of montmorillonite 2D nanosheets exfoliated by only DODAB (without SP-6). (B, C) The top-viewed (B) and cross-sectional (C) images of the film. The film showed a color of light yellow of native montmorillonite nanosheets.

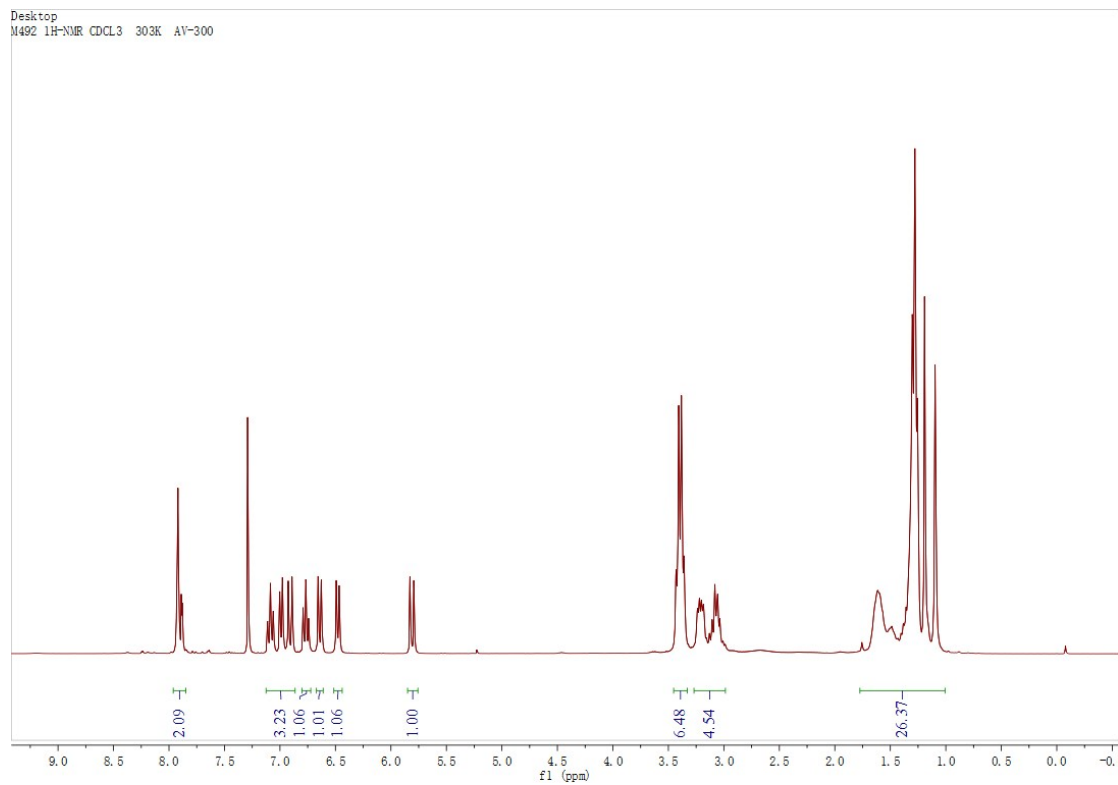

**Figure S3.** <sup>1</sup>H NMR spectrum of 1'-(6-triethylammoniohexyl)-3', 3'-dimethyl-6-nitrospiro (2H-1-benzopyran-2, 2'-indoline) bromide (SP-6) in CDCl<sub>3</sub>.

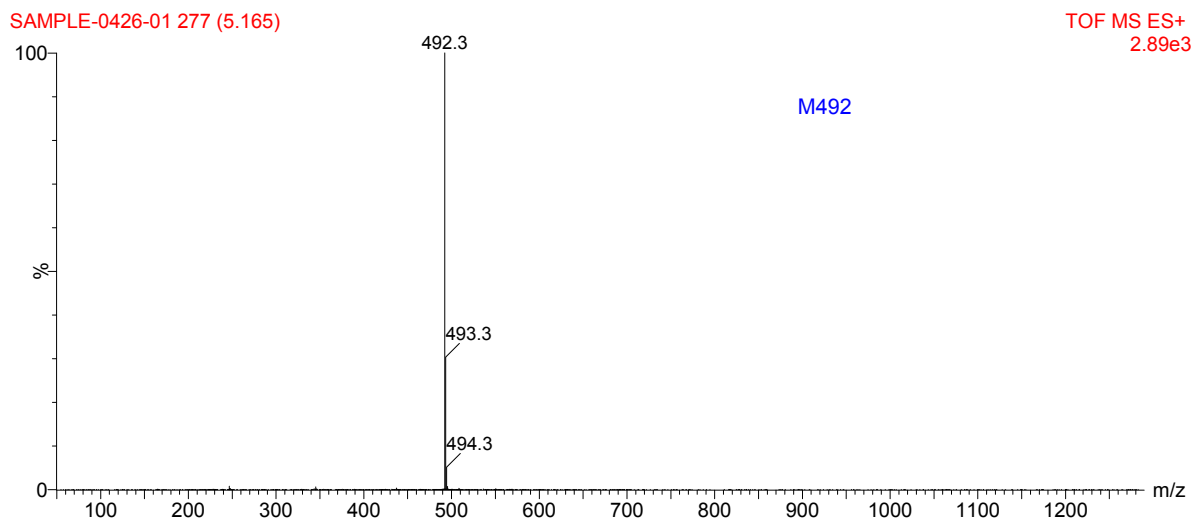

**Figure S4.** Mass spectrum of 1'-(6-triethylammoniohexyl)-3', 3'-dimethyl-6-nitrospiro (2H-1-benzopyran-2, 2'-indoline) bromide (SP-6).
